# Supplementary material for: Reliability of old and new ventricular fibrillation detection algorithms for automated external defibrillators
Source: Springer Nature journal article supplement (doi:10.1186/1475-925x-4-60), 2005-10-27

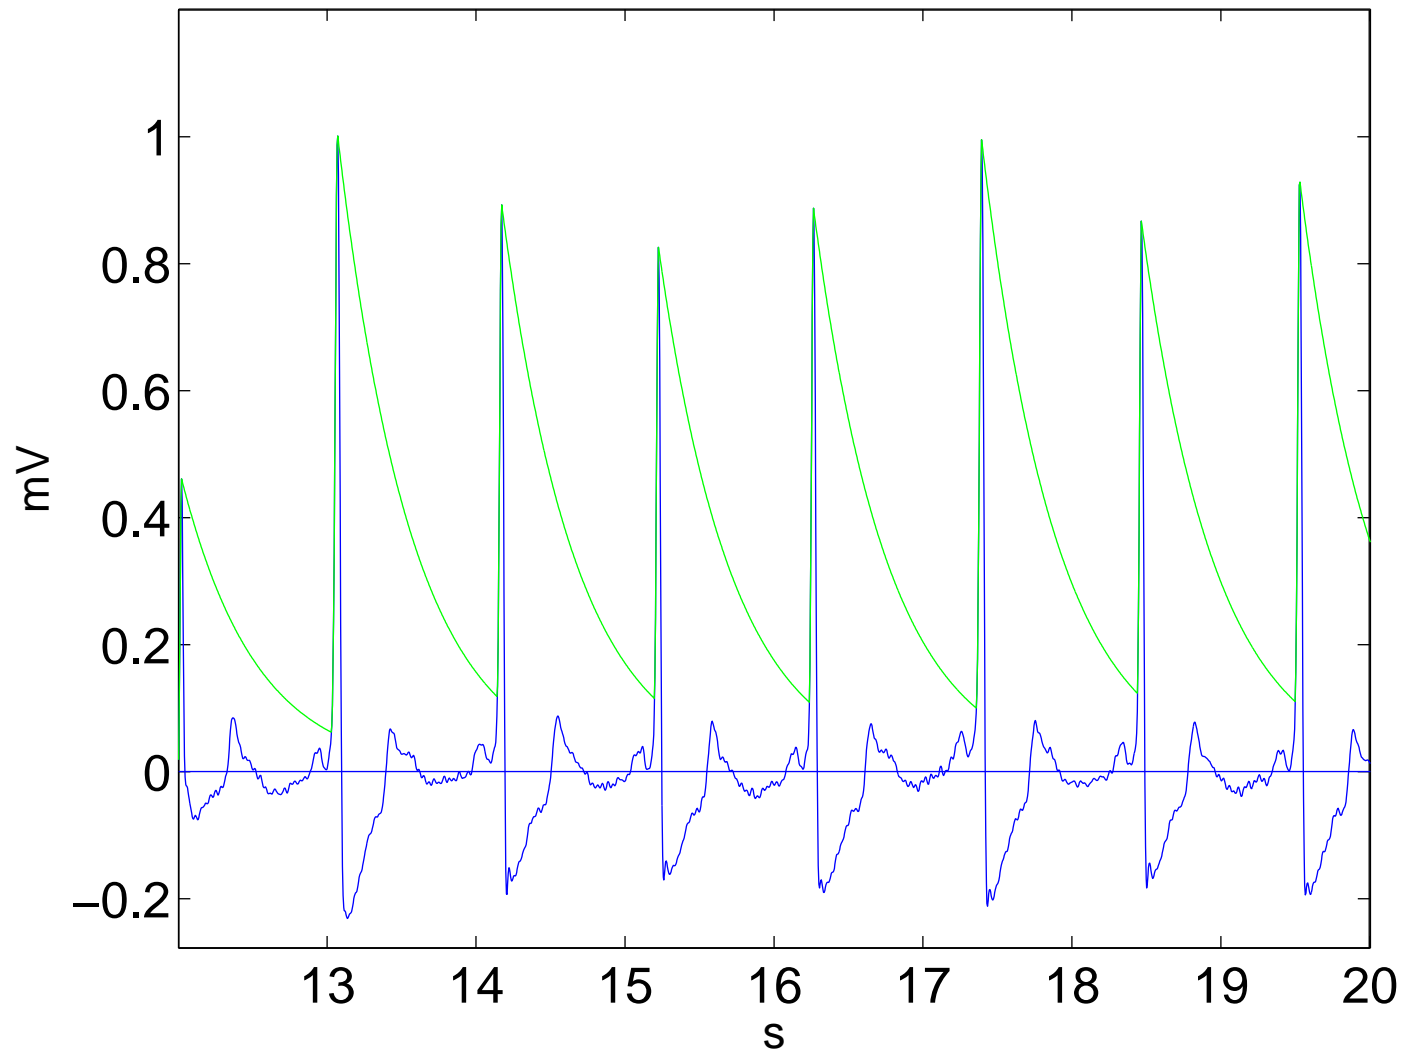

Supplement: 12938_2005_132_MOESM4_ESM.pdf [file 12938_2005_132_MOESM4_ESM.pdf]
